# Supplementary material for: Characterization of Transport-Enhanced Phase Separation in Porous Media Using a Lattice-Boltzmann Method
Source: Hindawi journal article supplement (doi:10.1155/2019/5176410), 2019-05-14
Supplement: f1 [file 5176410.f1.zip]

Archive with 3 entries (3 files):
- nullBF_Sigma_5e-2_Snw_5e-2_GEOFLUIDS_2703670.gif
- BF_2e-4_Sigma_5e-4_Snw_5e-2_GEOFLUIDS_2703669.gif
- BF_2e-4_Sigma_5e-2_Snw_5e-2_GEOFLUIDS_2703668.gif
